EDITORIAL NOTE

## Editorial Note: Investment needs to achieve SDGs: An overview

The *PLOS Sustainability and Transformation* Editors

A concern was raised that the journal's Managing Editor, rather than a member of the journal's Editorial Board, issued the Accept decision for this article [1] and is listed as the Editor on the article's webpage.

As is indicated in the published Peer Review History, the article's peer review included input from two external reviewers and a Section Editor on the journal's editorial board. To confirm that the article meets the journal's editorial standards, the Editor-in-Chief, Unai Pascual, has completed a full post-publication review of the article's content. Per the Editor-in-Chief's assessment the article meets the publication criteria for *PLOS Sustainability and Transformation*.

The *PLOS Sustainability and Transformation* Editors apologize that this issue was not identified prior to the article's publication.

### Reference

1. Kulkarni S, Hof A, Ambrósio G, Edelenbosch O, Köberle AC, van Rijn J, et al. (2022) Investment needs to achieve SDGs: An overview. *PLOS Sustain Transform* 1(7): e0000020. <https://doi.org/10.1371/journal.pstr.0000020>

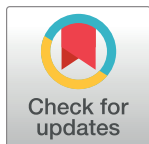

---

### OPEN ACCESS

**Citation:** The *PLOS Sustainability and Transformation* Editors (2024) Editorial Note: Investment needs to achieve SDGs: An overview. *PLOS Sustain Transform* 3(12): e0000148. <https://doi.org/10.1371/journal.pstr.0000148>

**Published:** December 4, 2024

**Copyright:** © 2024 The PLOS Sustainability and Transformation Editors. This is an open access article distributed under the terms of the [Creative Commons Attribution License](https://creativecommons.org/licenses/by/4.0/), which permits unrestricted use, distribution, and reproduction in any medium, provided the original author and source are credited.
